# Supplementary material for: Survey of Peer Support Specialists: Professional Activities, Self-Rated Skills, Job Satisfaction, and Financial Well-being
Source: Atypon-hosted journal article supplement (doi:10.1176/appi.ps.201800251), 2018-10-10
Supplement: appi.ps.201800251.ds001.pdf [file appi.ps.201800251.ds001.pdf]

**Appendix: Online Supplement**Demographics

| <b><u>Item</u></b>                   | <b><u>Frequency</u></b> | <b><u>Percent</u></b> |
|--------------------------------------|-------------------------|-----------------------|
| <b>Age</b>                           |                         |                       |
| 18 -24 years                         | 4                       | 1.33                  |
| 25-39 years                          | 7                       | 2.33                  |
| 30-39 years                          | 51                      | 16.94                 |
| 40-49 years                          | 71                      | 23.59                 |
| 50-59 years                          | 116                     | 38.54                 |
| 60+                                  | 52                      | 17.28                 |
| <b>Sex</b>                           |                         |                       |
| Male                                 | 95                      | 31.35                 |
| Female                               | 208                     | 69.65                 |
| <b>Race*</b>                         |                         |                       |
| African American                     | 96                      | 24.24                 |
| Asian American                       | 3                       | 0.75                  |
| Caucasian                            | 255                     | 64.39                 |
| Latino/a                             | 8                       | 2.02                  |
| Native American                      | 14                      | 3.53                  |
| Native Hawaiian/<br>Pacific Islander | 10                      | 2.52                  |
| Other                                | 10                      | 2.52                  |
| <b>Education</b>                     |                         |                       |
| High School or GED                   | 31                      | 10.23                 |
| Some College                         | 121                     | 39.93                 |
| Associate's Degree                   | 67                      | 22.11                 |
| Bachelor's Degree                    | 63                      | 20.79                 |
| Master's Degree+                     | 21                      | 6.93                  |

\* Respondents were instructed to select all that apply.

### Wages

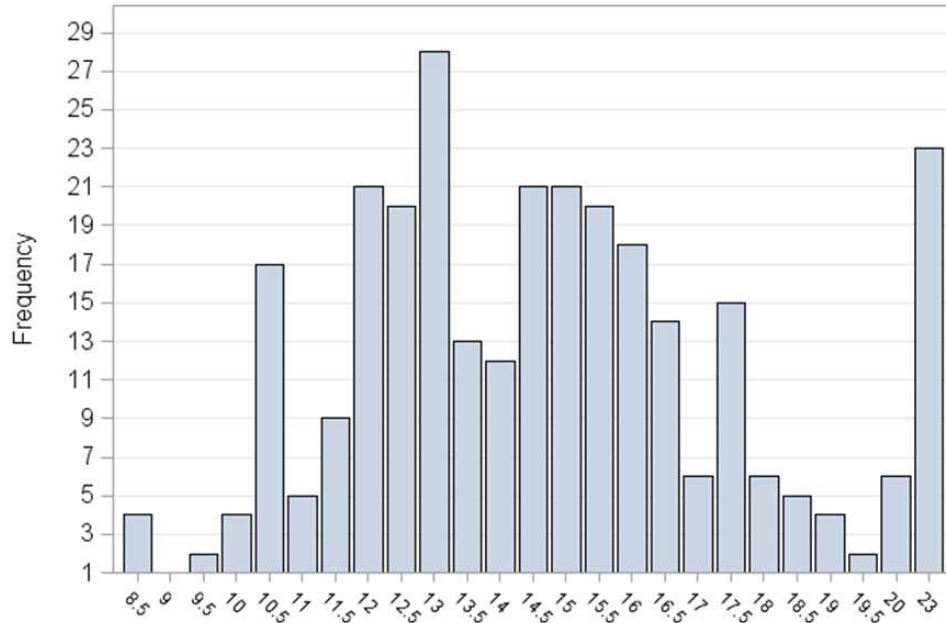

Note: 7.7 % of the sample responded “More than \$20.00”. These responses were set to \$23.00 for the analysis of wages by region.
